# Supplementary material for: G4LDB 2.2: a database for discovering and studying G-quadruplex and i-Motif ligands
Source: PubMed Central journal article supplement — Nucleic Acids Res. 2021 Oct 29;50(D1):D150–60. doi: 10.1093/nar/gkab952 (PMC8728129; doi:10.1093/nar/gkab952), 2021-10-29
Supplement: gkab952_supplemental_file.pdf [file gkab952_supplemental_file.pdf]

## **SUPPORTING DATA**

---

### **G4LDB 2.2: a database for discovering and studying G-quadruplex and i-Motif ligands**

Yu-huan Wang<sup>1,†</sup>, Qian-Fan Yang<sup>1,†</sup>, Xiao Lin<sup>1</sup>, Die Chen<sup>2</sup>, Zhi-yin Wang<sup>1</sup>, Bing Chen<sup>1</sup>, Hua-yi Han<sup>2</sup>,  
Hao-Di Chen<sup>1</sup>, Kai-Cong Cai<sup>3</sup>, Qian Li<sup>4</sup>, Shu Yang<sup>2, \*</sup>, Feng Li<sup>1, \*</sup>, Ya-Lin Tang<sup>4, \*</sup>

## SUPPORTING DATA

**Table S1 Representation of the active sites for docking models**

| Entry ID | Ligand site | Description                                                 | Grid box center (coordinate)       | Grid ball radius (Å) | Site representation                                                                   |
|----------|-------------|-------------------------------------------------------------|------------------------------------|----------------------|---------------------------------------------------------------------------------------|
| 1L1H     | 1           | Crystal Structure of the Quadruplex DNA-Drug Complex        | x: 17.276<br>y: 17.744<br>z: 7.802 | 15                   | 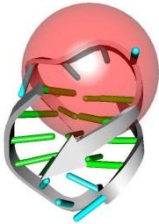   |
| 1O0K     | 1           | Structure of the First Parallel DNA Quadruplex-drug Complex | x: 12.708<br>y: -5.04<br>z: 19.795 | 15                   |    |
| 1O0K     | 2           | Structure of the First Parallel DNA Quadruplex-drug Complex | x: 15.905<br>y: 6.504<br>z: 13.337 | 15                   |  |

## SUPPORTING DATA

|      |   |                                                                                                                                                                                                                                               |                                     |    |                                                                                       |
|------|---|-----------------------------------------------------------------------------------------------------------------------------------------------------------------------------------------------------------------------------------------------|-------------------------------------|----|---------------------------------------------------------------------------------------|
| 1O0K | 3 | Structure of the First Parallel DNA Quadruplex-drug Complex                                                                                                                                                                                   | x: 19.292<br>y: -4.868<br>z: 7.144  | 15 | 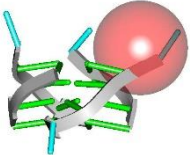   |
| 1NZM | 1 | NMR structure of the parallel-stranded DNA quadruplex d(TTAGGGT) <sub>4</sub> complexed with the telomerase inhibitor RHPS4                                                                                                                   | x: 29.171<br>y: 35.136<br>z: 18.012 | 15 |    |
| 1NZM | 2 | NMR structure of the parallel-stranded DNA quadruplex d(TTAGGGT) <sub>4</sub> complexed with the telomerase inhibitor RHPS4                                                                                                                   | x: 27.729<br>y: 29.372<br>z: 30.696 | 15 |   |
| 2A5R | 1 | Complex of tetra-(4-n-methylpyridyl) porphyrin with monomeric parallel-stranded DNA tetraplex, snap-back 3+1 3' G-tetrad, single-residue chain reversal loops, GAG triad in the context of GAAG diagonal loop, C-MYC promoter, NMR, 6 struct. | x: 2.689<br>y: 6.015<br>z: -5.483   | 15 |  |

## SUPPORTING DATA

|      |   |                                                                                     |                                        |    |                                                                                       |
|------|---|-------------------------------------------------------------------------------------|----------------------------------------|----|---------------------------------------------------------------------------------------|
| 2HRI | 1 | A parallel stranded human telomeric quadruplex in complex with the porphyrin TMPyP4 | x: -18.602<br>y: -11.651<br>z: -15.251 | 15 | 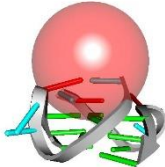   |
| 2HRI | 2 | A parallel stranded human telomeric quadruplex in complex with the porphyrin TMPyP4 | x: -9.873<br>y: 0.156<br>z: -0.082     | 15 |    |
| 2JT7 | 1 | NMR solution structure of the 4:1 distamycin A/[d(TGGGGT)]4 complex                 | x: 10.67<br>y: -0.132<br>z: 0.088      | 15 |    |
| 2JT7 | 2 | NMR solution structure of the 4:1 distamycin A/[d(TGGGGT)]4 complex                 | x: 7.369<br>y: -2.298<br>z: 0.31       | 15 |  |

## SUPPORTING DATA

|      |   |                                                                                                       |                                     |    |                                                                                       |
|------|---|-------------------------------------------------------------------------------------------------------|-------------------------------------|----|---------------------------------------------------------------------------------------|
| 2JWQ | 1 | G-quadruplex recognition by quinacridines: a SAR, NMR and Biological study                            | x: -5.532<br>y: -2.952<br>z: 21.319 | 15 | 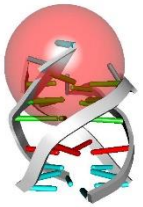   |
| 2JWQ | 2 | G-quadruplex recognition by quinacridines: a SAR, NMR and Biological study                            | x: -4.195<br>y: 1.861<br>z: 9.1     | 15 |    |
| 2KVY | 1 | NMR solution structure of the 4:1 complex between an uncharged distamycin A analogue and [d(TGGGGT)]4 | x: 33.63<br>y: 18.831<br>z: 36.73   | 15 |   |
| 2KVY | 2 | NMR solution structure of the 4:1 complex between an uncharged distamycin A analogue and [d(TGGGGT)]4 | x: 36.359<br>y: 22.394<br>z: 34.504 | 15 |  |

## SUPPORTING DATA

|      |   |                                                                                                                                           |                                      |    |                                                                                       |
|------|---|-------------------------------------------------------------------------------------------------------------------------------------------|--------------------------------------|----|---------------------------------------------------------------------------------------|
| 2L7V | 1 | Quindoline/G-quadruplex complex                                                                                                           | x: -1.351<br>y: -0.019<br>z: 2.804   | 15 | 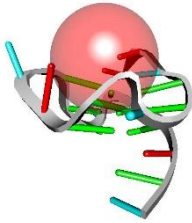   |
| 2L7V | 2 | Quindoline/G-quadruplex complex                                                                                                           | x: -1.264<br>y: -5.934<br>z: -10.339 | 15 |    |
| 2MB3 | 1 | Solution structure of an intramolecular (3+1) human telomeric G-quadruplex bound to a telomestatin derivative                             | x: 39.873<br>y: 30.281<br>z: 35.738  | 15 |    |
| 2MCC | 1 | Structural studies on dinuclear ruthenium(II) complexes that bind diastereoselectively to an anti-parallel folded human telomere sequence | x: -2.071<br>y: -6.804<br>z: -1.093  | 15 |  |

## SUPPORTING DATA

|      |   |                                                                                                                                           |                                     |    |                                                                                       |
|------|---|-------------------------------------------------------------------------------------------------------------------------------------------|-------------------------------------|----|---------------------------------------------------------------------------------------|
| 2MCO | 1 | Structural studies on dinuclear ruthenium(II) complexes that bind diastereoselectively to an anti-parallel folded human telomere sequence | x: 38.3<br>y: 21.485<br>z: 29.993   | 15 | 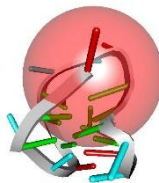   |
| 2MGN | 1 | Solution structure of a G-quadruplex bound to the bisquinolinium compound Phen-DC3                                                        | x: 36.402<br>y: 44.936<br>z: 35.387 | 15 |    |
| 2MS6 | 1 | Human Telomeric G-quadruplex DNA sequence (TTAGGGT) <sub>4</sub> complexed with Flavonoid Quercetin                                       | x: 10.69<br>y: 3.033<br>z: -1.282   | 15 |    |
| 2MS6 | 2 | Human Telomeric G-quadruplex DNA sequence (TTAGGGT) <sub>4</sub> complexed with Flavonoid Quercetin                                       | x: -9.953<br>y: -1.505<br>z: -2.866 | 15 |  |

## SUPPORTING DATA

|      |   |                                                                                                                             |                                     |    |                                                                                       |
|------|---|-----------------------------------------------------------------------------------------------------------------------------|-------------------------------------|----|---------------------------------------------------------------------------------------|
| 2N6C | 1 | Solution structure for quercetin complexed with c-myc G-quadruplex DNA                                                      | x: 0.933<br>y: 0.356<br>z: 7.91     | 15 | 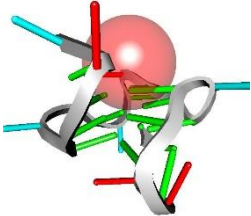   |
| 2N6C | 2 | Solution structure for quercetin complexed with c-myc G-quadruplex DNA                                                      | x: -2.63<br>y: 1.436<br>z: -6.926   | 15 |    |
| 3CE5 | 1 | A bimolecular parallel-stranded human telomeric quadruplex in complex with a 3,6,9-trisubstituted acridine molecule BRACO19 | x: 17.985<br>y: 18.088<br>z: 9.447  | 15 |    |
| 3CDM | 1 | Structural adaptation and conservation in quadruplex-drug recognition                                                       | x: 3.614<br>y: 12.255<br>z: -22.198 | 15 |  |



## SUPPORTING DATA

|      |   |                                                                                                                                                          |                                     |    |                                                                                                                                                                                                                                                   |
|------|---|----------------------------------------------------------------------------------------------------------------------------------------------------------|-------------------------------------|----|---------------------------------------------------------------------------------------------------------------------------------------------------------------------------------------------------------------------------------------------------|
| 3CDM | 2 | Structural adaptation and conservation in quadruplex-drug recognition                                                                                    | x: 2.63<br>y: 0.82<br>z: -14.778    | 15 | 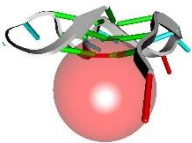 A 3D molecular model showing a red sphere representing a drug molecule bound to a DNA quadruplex structure. The DNA strands are depicted in green and grey.   |
| 3EM2 | 1 | A bimolecular anti-parallel-stranded <i>Oxytricha nova</i> telomeric quadruplex in complex with a 3,6-disubstituted acridine BSU-6038                    | x: 17.312<br>y: 17.848<br>z: 7.801  | 15 |  A 3D molecular model showing a red sphere representing a drug molecule bound to a DNA quadruplex structure. The DNA strands are depicted in green and cyan.   |
| 3EQW | 1 | A bimolecular anti-parallel-stranded <i>Oxytricha nova</i> telomeric quadruplex in complex with a 3,6-disubstituted acridine BSU-6042 in small unit cell | x: 10.296<br>y: -3.23<br>z: -8.135  | 15 |  A 3D molecular model showing a red sphere representing a drug molecule bound to a DNA quadruplex structure. The DNA strands are depicted in green and cyan.   |
| 3ERU | 1 | A bimolecular anti-parallel-stranded <i>Oxytricha nova</i> telomeric quadruplex in complex with a 3,6-disubstituted acridine BSU-6045                    | x: 10.307<br>y: -3.362<br>z: -7.942 | 15 |  A 3D molecular model showing a red sphere representing a drug molecule bound to a DNA quadruplex structure. The DNA strands are depicted in green and cyan. |

## SUPPORTING DATA

|      |   |                                                                                                                                                            |                                    |    |                                                                                       |
|------|---|------------------------------------------------------------------------------------------------------------------------------------------------------------|------------------------------------|----|---------------------------------------------------------------------------------------|
| 3ES0 | 1 | A bimolecular anti-parallel-stranded <i>Oxytricha nova</i> telomeric quadruplex in complex with a 3,6-disubstituted acridine BSU-6048                      | x: -10.137<br>y: 2.587<br>z: -7.78 | 15 | 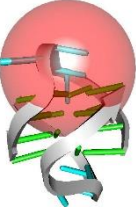   |
| 3ET8 | 1 | A bimolecular anti-parallel-stranded <i>Oxytricha nova</i> telomeric quadruplex in complex with a 3,6-disubstituted acridine BSU-6054                      | x: 17.319<br>y: 18.167<br>z: 8.09  | 15 |    |
| 3EUI | 1 | A bimolecular anti-parallel-stranded <i>Oxytricha nova</i> telomeric quadruplex in complex with a 3,6-disubstituted acridine BSU-6042 in a large unit cell | x: -6.889<br>y: -3.18<br>z: 5.511  | 15 |   |
| 3EUM | 1 | A bimolecular anti-parallel-stranded <i>Oxytricha nova</i> telomeric quadruplex in complex with a 3,6-disubstituted acridine BSU-6066                      | x: 17.504<br>y: 18.115<br>z: 8.209 | 15 |  |

## SUPPORTING DATA

|      |   |                                                                                                                                                                                        |                                    |    |                                                                                       |
|------|---|----------------------------------------------------------------------------------------------------------------------------------------------------------------------------------------|------------------------------------|----|---------------------------------------------------------------------------------------|
| 3NYP | 1 | A bimolecular anti-parallel-stranded <i>Oxytricha nova</i> telomeric quadruplex in complex with a 3,6-disubstituted acridine ligand containing bis-3-fluoropyrrolidine end side chains | x: 18.164<br>y: 18.525<br>z: 8.135 | 15 | 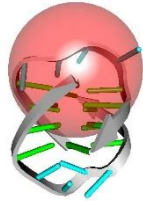   |
| 3NZ7 | 1 | A bimolecular anti-parallel-stranded <i>Oxytricha nova</i> telomeric quadruplex in complex with a 3,6-disubstituted acridine ligand containing bis-3-fluoropyrrolidine end side chains | x: 17.427<br>y: 17.988<br>z: 7.86  | 15 |    |
| 3R6R | 1 | Structure of the complex of an intramolecular human telomeric DNA with Berberine formed in K <sup>+</sup> solution                                                                     | x: 16.55<br>y: 27.836<br>z: 4.416  | 15 |    |
| 3R6R | 2 | Structure of the complex of an intramolecular human telomeric DNA with Berberine formed in K <sup>+</sup> solution                                                                     | x: 16.553<br>y: 28.01<br>z: -2.948 | 15 |  |

## SUPPORTING DATA

|      |   |                                                                                                                    |                                      |    |                                                                                       |
|------|---|--------------------------------------------------------------------------------------------------------------------|--------------------------------------|----|---------------------------------------------------------------------------------------|
| 3R6R | 3 | Structure of the complex of an intramolecular human telomeric DNA with Berberine formed in K <sup>+</sup> solution | x: 4.526<br>y: 21.157<br>z: -1.52    | 15 | 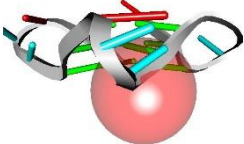   |
| 3R6R | 4 | Structure of the complex of an intramolecular human telomeric DNA with Berberine formed in K <sup>+</sup> solution | x: 2.723<br>y: 26.184<br>z: 3.24     | 15 |    |
| 3SC8 | 1 | Crystal structure of an intramolecular human telomeric DNA G-quadruplex bound by the naphthalene diimide BMSG-SH-3 | x: -17.969<br>y: -13.586<br>z: 8.007 | 15 |    |
| 3T5E | 1 | Crystal structure of an intramolecular human telomeric DNA G-quadruplex bound by the naphthalene diimide BMSG-SH-4 | x: -22.581<br>y: 6.872<br>z: -9.713  | 15 |  |

## SUPPORTING DATA

|      |   |                                                                                                                                    |                                      |    |                                                                                       |
|------|---|------------------------------------------------------------------------------------------------------------------------------------|--------------------------------------|----|---------------------------------------------------------------------------------------|
| 3UYH | 1 | Crystal structure of an intramolecular human telomeric DNA G-quadruplex bound by the naphthalene diimide compound, MM41            | x: -2.691<br>y: -22.446<br>z: -7.872 | 15 | 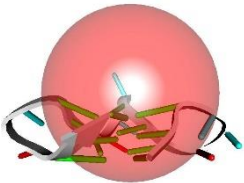   |
| 4DA3 | 1 | Crystal structure of an intramolecular human telomeric DNA G-quadruplex 21-mer bound by the naphthalene diimide compound MM41      | x: 18.114<br>y: -13.41<br>z: 0.52    | 15 |    |
| 4DAQ | 1 | Crystal structure of an intramolecular human telomeric DNA G-quadruplex 21-mer bound by the naphthalene diimide compound BMSG-SH-3 | x: 17.758<br>y: 13.207<br>z: 7.868   | 15 |   |
| 4FXM | 1 | Crystal structure of the complex of a human telomeric repeat G-quadruplex and N-methyl mesoporphyrin IX (P21212)                   | x: -5.373<br>y: 10.823<br>z: -1.049  | 15 |  |

## SUPPORTING DATA

|      |   |                                                                                                              |                                       |    |                                                                                       |
|------|---|--------------------------------------------------------------------------------------------------------------|---------------------------------------|----|---------------------------------------------------------------------------------------|
| 4G0F | 1 | Crystal structure of the complex of a human telomeric repeat G-quadruplex and N-methyl mesoporphyrin IX (P6) | x: 8.42<br>y: 46.985<br>z: -1.579     | 15 | 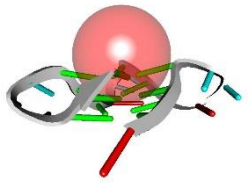   |
| 4P1D | 1 | Structure of the complex of a bimolecular human telomeric DNA with Coptisine                                 | x: -1.644<br>y: -21.422<br>z: -11.925 | 15 |    |
| 4TS0 | 1 | Crystal structure of the Spinach RNA aptamer in complex with DFHBI, barium ions                              | x: 29.027<br>y: 24.936<br>z: 15.935   | 15 |   |
| 4TS2 | 1 | Crystal structure of the Spinach RNA aptamer in complex with DFHBI, magnesium ions                           | x: -5.286<br>y: -2.085<br>z: -10.12   | 15 |  |

## SUPPORTING DATA

|      |   |                                                                                            |                                      |    |                                                                                       |
|------|---|--------------------------------------------------------------------------------------------|--------------------------------------|----|---------------------------------------------------------------------------------------|
| 5BJO | 1 | Crystal structure of the Corn RNA aptamer in complex with DFHO, site-specific 5-iodo-U     | x: 3.729<br>y: 9.948<br>z: -13.402   | 15 | 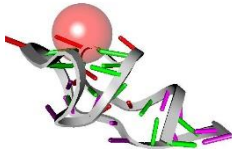   |
| 5BJP | 1 | Crystal structure of the Corn RNA aptamer in complex with DFHO, iridium hexammine soak     | x: 3.953<br>y: -10.139<br>z: -85.407 | 15 |    |
| 5CCW | 1 | Structure of the complex of a human telomeric DNA with Au(caffeine-2-ylidene) <sub>2</sub> | x: -0.984<br>y: 12.947<br>z: -17.128 | 15 |    |
| 5CCW | 2 | Structure of the complex of a human telomeric DNA with Au(caffeine-2-ylidene) <sub>2</sub> | x: -1.386<br>y: 12.968<br>z: -9      | 15 |  |

## SUPPORTING DATA

|      |   |                                                                                                                                        |                                     |    |                                                                                       |
|------|---|----------------------------------------------------------------------------------------------------------------------------------------|-------------------------------------|----|---------------------------------------------------------------------------------------|
| 5CCW | 3 | Structure of the complex of a human telomeric DNA with Au(caffein-2-ylidene) <sub>2</sub>                                              | x: -3.5<br>y: 0.019<br>z: -14.685   | 15 | 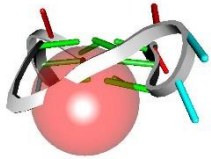   |
| 5CDB | 1 | Structure of the complex of a bimolecular human telomeric DNA with a 13-diphenylalkyl Berberine derivative                             | x: 0.266<br>y: -19.945<br>z: 5.942  | 15 |    |
| 5LIG | 1 | G-Quadruplex formed at the 5'-end of NHEIII_1 Element in human c-MYC promoter bound to triangulenium based fluorescence probe DAOTA-M2 | x: 31.332<br>y: 31.494<br>z: 27.882 | 15 |    |
| 5LIG | 2 | G-Quadruplex formed at the 5'-end of NHEIII_1 Element in human c-MYC promoter bound to triangulenium based fluorescence probe DAOTA-M2 | x: 21.082<br>y: 22.526<br>z: 20.427 | 15 |  |



## SUPPORTING DATA

---

|      |   |                                                             |                                     |    |                                                                                       |
|------|---|-------------------------------------------------------------|-------------------------------------|----|---------------------------------------------------------------------------------------|
| 5LS8 | 1 | Light-activated ruthenium complex bound to a DNA quadruplex | x: 23.146<br>y: 30.753<br>z: 2.864  | 15 | 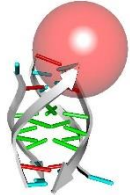   |
| 5LS8 | 2 | Light-activated ruthenium complex bound to a DNA quadruplex | x: 21.549<br>y: 27.984<br>z: 10.919 | 15 |    |
| 5LS8 | 3 | Light-activated ruthenium complex bound to a DNA quadruplex | x: 19.415<br>y: 18.982<br>z: 2.228  | 15 |    |
| 5LS8 | 4 | Light-activated ruthenium complex bound to a DNA quadruplex | x: 11.599<br>y: 5.311<br>z: 11.487  | 15 |  |

## SUPPORTING DATA

|      |   |                                                                                        |                                     |    |                                                                                       |
|------|---|----------------------------------------------------------------------------------------|-------------------------------------|----|---------------------------------------------------------------------------------------|
| 5MVB | 1 | Solution structure of a human G-Quadruplex hybrid-2 form in complex with a Gold-ligand | x: -4.387<br>y: -0.927<br>z: 3.386  | 15 | 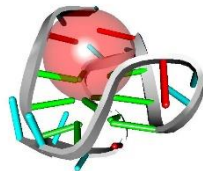   |
| 5V3F | 1 | Co-crystal structure of the fluorogenic RNA Mango                                      | x: 8.285<br>y: 76.333<br>z: 154.051 | 15 |    |
| 5W77 | 1 | Solution structure of the MYC G-quadruplex bound to small molecule DC-34               | x: 28.258<br>y: 4.461<br>z: 6.032   | 15 |   |
| 5W77 | 2 | Solution structure of the MYC G-quadruplex bound to small molecule DC-34               | x: 36.693<br>y: -0.914<br>z: -6.17  | 15 |  |

## SUPPORTING DATA

|      |   |                                                                                                                                       |                                      |    |                                                                                       |
|------|---|---------------------------------------------------------------------------------------------------------------------------------------|--------------------------------------|----|---------------------------------------------------------------------------------------|
| 5Z80 | 1 | Solution structure for the 1:1 complex of a platinum(II)-based tripod bound to a hybrid-1 human telomeric G-quadruplex                | x: -6.181<br>y: -0.394<br>z: -2.117  | 20 | 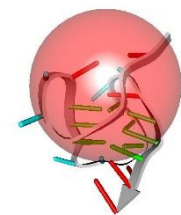   |
| 5Z8F | 1 | Solution structure for the unique dimeric 4:2 complex of a platinum(II)-based tripod bound to a hybrid-1 human telomeric G-quadruplex | x: -8.913<br>y: -3.167<br>z: 0.318   | 20 |    |
| 5Z8F | 2 | Solution structure for the unique dimeric 4:2 complex of a platinum(II)-based tripod bound to a hybrid-1 human telomeric G-quadruplex | x: -24.882<br>y: -2.014<br>z: -1.619 | 20 |   |
| 6C63 | 1 | Crystal Structure of the Mango-II Fluorescent Aptamer Bound to TO1-Biotin                                                             | x: 7.999<br>y: 32.542<br>z: -20.743  | 15 |  |

## SUPPORTING DATA

|      |   |                                                                                |                                     |    |                                                                                       |
|------|---|--------------------------------------------------------------------------------|-------------------------------------|----|---------------------------------------------------------------------------------------|
| 6C64 | 1 | Crystal Structure of the Mango-II Fluorescent Aptamer Bound to TO3-Biotin      | x: 7.566<br>y: 34.962<br>z: -21.916 | 15 | 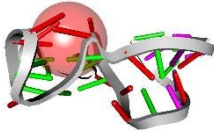   |
| 6C65 | 1 | Crystal Structure of the Mango-II-A22U Fluorescent Aptamer Bound to TO1-Biotin | x: 8.103<br>y: 32.177<br>z: -21.022 | 15 |    |
| 6CCW | 1 | Hybrid-2 form Human Telomeric G Quadruplex in Complex with Epiberberine        | x: -2.028<br>y: 6.237<br>z: 0.635   | 15 |   |
| 6E81 | 1 | Crystal structure of the Corn aptamer in complex with ThT                      | x: 11.81<br>y: 52.972<br>z: 28.461  | 15 |  |

## SUPPORTING DATA

|      |   |                                                                       |                                      |    |                                                                                       |
|------|---|-----------------------------------------------------------------------|--------------------------------------|----|---------------------------------------------------------------------------------------|
| 6E82 | 1 | Crystal structure of the Corn aptamer mutant A14U in complex with ThT | x: 11.647<br>y: 53.119<br>z: 28.272  | 15 | 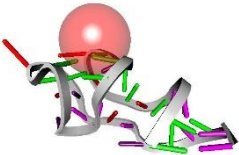   |
| 6E84 | 1 | Crystal structure of the Corn aptamer in complex with TO              | x: 12.952<br>y: 23.541<br>z: -0.929  | 15 |    |
| 6E8S | 1 | Structure of the iMango-III aptamer bound to TO1-Biotin               | x: -8.514<br>y: -69.609<br>z: 28.165 | 15 |   |
| 6E8T | 1 | Structure of the Mango-III (A10U) aptamer bound to TO1-Biotin         | x: -7.859<br>y: 37.289<br>z: 74.375  | 15 |  |

## SUPPORTING DATA

|      |   |                                                                                                          |                                     |    |                                                                                       |
|------|---|----------------------------------------------------------------------------------------------------------|-------------------------------------|----|---------------------------------------------------------------------------------------|
| 6E8U | 1 | Structure of the Mango-III (A10U) aptamer bound to TO1-Biotin                                            | x: 7.979<br>y: -4.489<br>z: -23.315 | 20 | 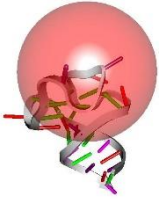   |
| 6FC9 | 1 | The 1,8-bis(aminomethyl)anthracene and Quadruplex-duplex junction complex                                | x: 21.527<br>y: 20.957<br>z: 24.284 | 15 |    |
| 6H5R | 1 | Structure of the complex of a human telomeric DNA with bis(1-butyl-3-methyl-imidazole-2-ylidene) gold(I) | x: -0.228<br>y: 1.455<br>z: 1.184   | 15 |   |
| 6JJ0 | 1 | NMR structure of the 1:1 complex of a carbazole derivative BMVC bound to c-MYC G-quadruplex              | x: 8.057<br>y: -9.4<br>z: -6.855    | 15 |  |

## SUPPORTING DATA

|      |   |                                                                                                                |                                     |    |                                                                                       |
|------|---|----------------------------------------------------------------------------------------------------------------|-------------------------------------|----|---------------------------------------------------------------------------------------|
| 6JWD | 1 | structure of RET G-quadruplex in complex with berberine                                                        | x: 0.794<br>y: 5.645<br>z: 1.025    | 15 | 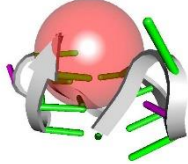   |
| 6JWE | 1 | structure of RET G-quadruplex in complex with colchicine                                                       | x: 2.888<br>y: 0.884<br>z: 6.584    | 15 |    |
| 6K3Y | 1 | G-quadruplex complex with cyclic dinucleotide 3'-3' cGAMP                                                      | x: -3.148<br>y: -8.779<br>z: -3.716 | 15 |   |
| 6KFI | 1 | NMR solution structure of the 1:1 complex of Tel26 G-quadruplex and a tripodal cationic fluorescent probe NBTE | x: -6.998<br>y: 0.884<br>z: -1.588  | 15 |  |

## SUPPORTING DATA

|      |   |                                                                                                                  |                                     |    |                                                                                       |
|------|---|------------------------------------------------------------------------------------------------------------------|-------------------------------------|----|---------------------------------------------------------------------------------------|
| 6KFJ | 1 | NMR solution structure of the 1:1 complex of wtTel26 G-quadruplex and a tripodal cationic fluorescent probe NBTE | x: 7.688<br>y: -1.256<br>z: 3.745   | 15 | 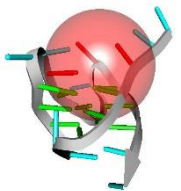   |
| 6KFL | 1 | Crystal structure of a two-quartet DNA G-quadruplex complexed with the porphyrin TMPyP4                          | x: 23.501<br>y: -9.321<br>z: -0.79  | 15 |    |
| 6KN4 | 1 | HUMAN PARALLEL STRANDED 7-MER G-QUADRUPLEX COMPLEXED WITH 2 ADRIAMYCIN (DM2) MOLECULES                           | x: 32.184<br>y: 32.902<br>z: 37.247 | 15 |    |
| 6KN4 | 2 | HUMAN PARALLEL STRANDED 7-MER G-QUADRUPLEX COMPLEXED WITH 2 ADRIAMYCIN (DM2) MOLECULES                           | x: 24.372<br>y: 17.079<br>z: 12.444 | 15 |  |



## SUPPORTING DATA

|      |   |                                                                                                            |                                     |    |                                                                                       |
|------|---|------------------------------------------------------------------------------------------------------------|-------------------------------------|----|---------------------------------------------------------------------------------------|
| 6KXZ | 1 | HUMAN PARALLEL STRANDED 7-MER G-QUADRUPLEX COMPLEXED WITH 2 EPIRUBICIN (EPI) MOLECULES                     | x: 35.996<br>y: 30.286<br>z: 34.431 | 15 | 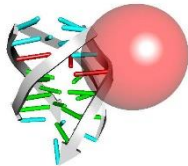   |
| 6KXZ | 2 | HUMAN PARALLEL STRANDED 7-MER G-QUADRUPLEX COMPLEXED WITH 2 EPIRUBICIN (EPI) MOLECULES                     | x: 23.974<br>y: 23.527<br>z: 8.213  | 15 |    |
| 6LNZ | 1 | NMR solution structure of VEGF G-quadruplex bound a non-planar cyclometalated-carbene platinum(II) complex | x: 10.029<br>y: -24.041<br>z: -1.79 | 15 |   |
| 6O2L | 1 | NMR structure of the 2:1 complex of a carbazole derivative BMVC bound to c-MYC G-quadruplex                | x: 3.292<br>y: -0.177<br>z: 3.882   | 15 |  |

## SUPPORTING DATA

|      |   |                                                                                                      |                                     |    |                                                                                       |
|------|---|------------------------------------------------------------------------------------------------------|-------------------------------------|----|---------------------------------------------------------------------------------------|
| 6O2L | 2 | NMR structure of the 2:1 complex of a carbazole derivative BMVC bound to c-MYC G-quadruplex          | x: 8.057<br>y: -9.638<br>z: -7.484  | 15 |    |
| 6P45 | 1 | Crystal structure of the G-quadruplex formed by (TGGGT)4 in complex with N-methylmesoporphyrin IX    | x: -29.133<br>y: 6.944<br>z: 4.35   | 15 |    |
| 6PNK | 1 | Crystal structure of the G-quadruplex formed by (GGGTT)3GGG in complex with N-methylmesoporphyrin IX | x: -8.572<br>y: 5.769<br>z: -34.935 | 15 |    |
| 6RNL | 1 | L-[Ru(TAP)2(dppz)]2+ bound to the G-quadruplex forming sequence d(TAGGGTT)                           | x: 1.884<br>y: 2.379<br>z: -14.83   | 15 |  |

## SUPPORTING DATA

|      |   |                                                                                              |                                      |    |                                                                                       |
|------|---|----------------------------------------------------------------------------------------------|--------------------------------------|----|---------------------------------------------------------------------------------------|
| 6RNL | 2 | L-[Ru(TAP)2(dppz)]2+ bound to the G-quadruplex forming sequence d(TAGGGTT)                   | x: -9.305<br>y: -1.832<br>z: -12.177 | 15 | 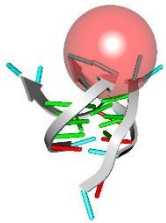   |
| 6RNL | 3 | L-[Ru(TAP)2(dppz)]2+ bound to the G-quadruplex forming sequence d(TAGGGTT)                   | x: -20.039<br>y: 0.21<br>z: -10.069  | 15 |    |
| 6RNL | 4 | L-[Ru(TAP)2(dppz)]2+ bound to the G-quadruplex forming sequence d(TAGGGTT)                   | x: -29.375<br>y: -4.428<br>z: -7.878 | 15 |   |
| 6S15 | 1 | Pyridine derivative of the natural alkaloid Berberine as Human Telomeric G-quadruplex Binder | x: -0.835<br>y: -20.139<br>z: 5.478  | 15 |  |

## SUPPORTING DATA

|      |   |                                                                                                                                                            |                                      |    |                                                                                       |
|------|---|------------------------------------------------------------------------------------------------------------------------------------------------------------|--------------------------------------|----|---------------------------------------------------------------------------------------|
| 6V0L | 1 | PDGFR-b Promoter Forms a G-Vacancy Quadruplex that Can be Complemented by dGMP: Molecular Structure and Recognition of Guanine Derivatives and Metabolites | x: 29.854<br>y: 27.842<br>z: 19.102  | 15 | 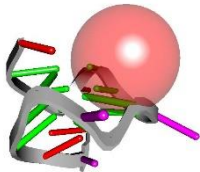   |
| 6V9B | 1 | Co-crystal structure of the fluorogenic Mango-IV homodimer bound to TO1-Biotin                                                                             | x: 40.822<br>y: -1.75<br>z: -6.006   | 15 |    |
| 6V9B | 2 | Co-crystal structure of the fluorogenic Mango-IV homodimer bound to TO1-Biotin                                                                             | x: 6.874<br>y: -11.639<br>z: -36.737 | 15 |   |
| 6V9B | 3 | Co-crystal structure of the fluorogenic Mango-IV homodimer bound to TO1-Biotin                                                                             | x: 8.504<br>y: -11.398<br>z: -33.378 | 15 |  |

## SUPPORTING DATA

|      |   |                                                                                                    |                                     |    |                                                                                       |
|------|---|----------------------------------------------------------------------------------------------------|-------------------------------------|----|---------------------------------------------------------------------------------------|
| 6V9D | 1 | Co-crystal structure of the fluorogenic Mango-IV homodimer bound to TO1-Biotin                     | x: 19.703<br>y: 30.545<br>z: 17.212 | 15 | 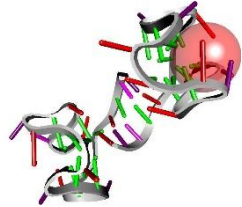   |
| 6V9D | 2 | Co-crystal structure of the fluorogenic Mango-IV homodimer bound to TO1-Biotin                     | x: 13.617<br>y: 0.094<br>z: -16.02  | 15 |    |
| 6V9D | 3 | Co-crystal structure of the fluorogenic Mango-IV homodimer bound to TO1-Biotin                     | x: 14.54<br>y: 2.003<br>z: -12.94   | 15 |    |
| 6XCL | 1 | Crystal Structure of human telomeric DNA G-quadruplex in complex with a novel platinum(II) complex | x: 19.152<br>y: -14.951<br>z: 8.818 | 15 |  |

## SUPPORTING DATA

---

|      |   |                                                                                                    |                                     |    |                                                                                     |
|------|---|----------------------------------------------------------------------------------------------------|-------------------------------------|----|-------------------------------------------------------------------------------------|
| 6XCL | 2 | Crystal Structure of human telomeric DNA G-quadruplex in complex with a novel platinum(II) complex | x: 16.176<br>y: -27.743<br>z: 8.895 | 15 | 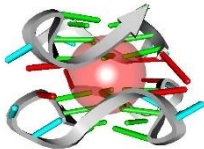 |
|------|---|----------------------------------------------------------------------------------------------------|-------------------------------------|----|-------------------------------------------------------------------------------------|

## SUPPORTING DATA

---

**Table S2 Receptor-ligand complex information**

| Ligand ID | PDB ID | Method            | Reference                                                                                                                                                                                                                                                                   |
|-----------|--------|-------------------|-----------------------------------------------------------------------------------------------------------------------------------------------------------------------------------------------------------------------------------------------------------------------------|
| G4L8336   | 1O0K   | X-RAY DIFFRACTION | Clark, G.R., Pytel, P.D., Squire, C.J., Neidle, S.<br>Structure of the First Parallel DNA Quadruplex-drug Complex<br>Journal of the American Chemical Society<br>10.1021/ja0297988 (2003)                                                                                   |
| G4L7743   | 1NZM   | SOLUTION NMR      | Gavathiotis, E., Heald, R.A., Stevens, M.F.G., Searle, M.S.<br>Drug Recognition and Stabilisation of the Parallel-stranded DNA Quadruplex d(TTAGGGT) <sub>4</sub> Containing the Human Telomeric Repeat<br>Journal of Molecular Biology<br>10.1016/j.jmb.2003.09.018 (2003) |
| G4L0073   | 2A5R   | SOLUTION NMR      | Phan, A.T., Kuryavyi, V., Gaw, H.Y., Patel, D.J.<br>Small-molecule interaction with a five-guanine-tract G-quadruplex structure from the human MYC promoter.<br>Nature Chemical Biology<br>10.1038/nchembio723 (2005)                                                       |
| G4L0073   | 2HRI   | X-RAY DIFFRACTION | Parkinson, G.N., Ghosh, R., Neidle, S.<br>Structural basis for binding of porphyrin to human telomeres.<br>Biochemistry<br>10.1021/bi062244n (2007)                                                                                                                         |
| G4L7462   | 2JT7   | SOLUTION NMR      | Martino, L., Virno, A., Pagano, B., Virgilio, A., Di Micco, S., Galeone, A., Giancola, C., Bifulco, G., Mayol, L., Randazzo, A.<br>Structural and thermodynamic studies of the interaction of distamycin A with the                                                         |

## SUPPORTING DATA

---

|         |      |                   |                                                                                                                                                                                                                                                      |
|---------|------|-------------------|------------------------------------------------------------------------------------------------------------------------------------------------------------------------------------------------------------------------------------------------------|
|         |      |                   | parallel quadruplex structure [d(TGGGGT)] <sub>4</sub><br>Journal of the American Chemical Society<br>10.1021/ja075710k (2007)                                                                                                                       |
| G4L6644 | 2L7V | SOLUTION NMR      | Dai, J., Carver, M., Hurley, L.H., Yang, D.<br>Solution Structure of a 2:1 Quindoline-c-MYC G-Quadruplex: Insights into G-Quadruplex-Interactive Small Molecule Drug Design.<br>Journal of the American Chemical Society<br>10.1021/ja205646q (2011) |
| G4L1056 | 2MGN | SOLUTION NMR      | Chung, W.J., Heddi, B., Hamon, F., Teulade-Fichou, M.P., Phan, A.T.<br>Solution Structure of a G-quadruplex Bound to the Bisquinolinium Compound Phen-DC3.<br>Angewandte Chemie International Edition<br>10.1002/anie.201308063 (2014)               |
| G4L7849 | 2MS6 | SOLUTION NMR      | Tawani, A., Kumar, A.<br>Structural Insight into the interaction of Flavonoids with Human Telomeric Sequence<br>Scientific Reports<br>10.1038/srep17574 (2015)                                                                                       |
| G4L7849 | 2N6C | SOLUTION NMR      | Kumar, A., Tawani, A.<br>Solution structure for quercetin complexed with c-myc G-quadruplex DNA<br><br>To be published ()                                                                                                                            |
| G4L6191 | 3CCO | X-RAY DIFFRACTION | Parkinson, G.N., Cuenca, F., Neidle, S.<br>Topology conservation and loop flexibility in quadruplex-drug recognition: crystal structures of inter- and intramolecular telomeric DNA quadruplex-drug complexes<br>Journal of Medicinal Chemistry      |



## SUPPORTING DATA

---

|         |      |                   |                                                                                                                                                                                                                                                                                     |
|---------|------|-------------------|-------------------------------------------------------------------------------------------------------------------------------------------------------------------------------------------------------------------------------------------------------------------------------------|
|         |      |                   | 10.1016/j.jmb.2008.06.022 (2008)                                                                                                                                                                                                                                                    |
| G4L6191 | 3CDM | X-RAY DIFFRACTION | Parkinson, G.N., Cuenca, F., Neidle, S.<br>Topology conservation and loop flexibility in quadruplex-drug recognition: crystal structures of inter- and intramolecular telomeric DNA quadruplex-drug complexes<br>Journal of Medicinal Chemistry<br>10.1016/j.jmb.2008.06.022 (2008) |
| G4L1041 | 3R6R | X-RAY DIFFRACTION | Bazzicalupi, C., Ferraroni, M., Bilia, A.R., Scheggi, F., Gratteri, P.<br>The crystal structure of human telomeric DNA complexed with berberine: an interesting case of stacked ligand to G-tetrad ratio higher than 1:1.<br>Nucleic Acids Research<br>10.1093/nar/gks1001 (2013)   |
| G4L2016 | 3SC8 | X-RAY DIFFRACTION | Collie, G.W., Promontorio, R., Hampel, S.M., Micco, M., Neidle, S., Parkinson, G.N.<br>Structural basis for telomeric g-quadruplex targeting by naphthalene diimide ligands.<br>Journal of the American Chemical Society<br>10.1021/ja2102423 (2012)                                |
| G4L8336 | 3TVB | X-RAY DIFFRACTION | Clark, G.R., Pytel, P.D., Squire, C.J.<br>The high-resolution crystal structure of a parallel intermolecular DNA G-4 quadruplex/drug complex employing syn glycosyl linkages.<br>Nucleic Acids Research<br>10.1093/nar/gks193 (2012)                                                |
| G4L2017 | 3T5E | X-RAY DIFFRACTION | Collie, G.W., Promontorio, R., Hampel, S.M., Micco, M., Neidle, S., Parkinson, G.N.<br>Structural basis for telomeric g-quadruplex targeting by naphthalene diimide ligands.<br>Journal of the American Chemical Society<br>10.1021/ja2102423 (2012)                                |
| G4L7173 | 3UYH | X-RAY DIFFRACTION | Micco, M., Collie, G.W., Dale, A.G., Ohnmacht, S.A., Pazitna, I., Gunaratnam, M.,                                                                                                                                                                                                   |

## SUPPORTING DATA

---

|         |      |                   |                                                                                                                                                                                                                                                                                                                                                                 |
|---------|------|-------------------|-----------------------------------------------------------------------------------------------------------------------------------------------------------------------------------------------------------------------------------------------------------------------------------------------------------------------------------------------------------------|
|         |      |                   | <p>Reszka, A.P., Neidle, S.<br/>Structure-based design and evaluation of naphthalene diimide g-quadruplex ligands as telomere targeting agents in pancreatic cancer cells.<br/>Journal of Medicinal Chemistry<br/>10.1021/jm301899y (2013)</p>                                                                                                                  |
| G4L7173 | 4DA3 | X-RAY DIFFRACTION | <p>Micco, M., Collie, G.W., Dale, A.G., Ohnmacht, S.A., Pazitna, I., Gunaratnam, M., Reszka, A.P., Neidle, S.<br/>Structure-based design and evaluation of naphthalene diimide g-quadruplex ligands as telomere targeting agents in pancreatic cancer cells.<br/>Journal of Medicinal Chemistry<br/>10.1021/jm301899y (2013)</p>                                |
| G4L2016 | 4DAQ | X-RAY DIFFRACTION | <p>Micco, M., Collie, G.W., Dale, A.G., Ohnmacht, S.A., Pazitna, I., Gunaratnam, M., Reszka, A.P., Neidle, S.<br/>Structure-based design and evaluation of naphthalene diimide g-quadruplex ligands as telomere targeting agents in pancreatic cancer cells.<br/>Journal of Medicinal Chemistry<br/>10.1021/jm301899y (2013)</p>                                |
| G4L0208 | 4L0A | X-RAY DIFFRACTION | <p>Russo Krauss, I., Parkinson, G.N., Merlino, A., Mattia, C.A., Randazzo, A., Novellino, E., Mazzarella, L., Sica, F.<br/>A regular thymine tetrad and a peculiar supramolecular assembly in the first crystal structure of an all-LNA G-quadruplex<br/>Acta Crystallographica. Section D: Biological Crystallography<br/>10.1107/S1399004713028095 (2014)</p> |
| G4L7467 | 5CCW | X-RAY DIFFRACTION | <p>Bazzicalupi, C., Ferraroni, M., Papi, F., Massai, L., Bertrand, B., Messori, L., Gratteri, P., Casini, A.</p>                                                                                                                                                                                                                                                |

## SUPPORTING DATA

---

|         |      |                   |                                                                                                                                                                                                                                                                                                                                   |
|---------|------|-------------------|-----------------------------------------------------------------------------------------------------------------------------------------------------------------------------------------------------------------------------------------------------------------------------------------------------------------------------------|
|         |      |                   | Determinants for Tight and Selective Binding of a Medicinal Dicarbene Gold(I) Complex to a Telomeric DNA G-Quadruplex: a Joint ESI MS and XRD Investigation.<br>Angewandte Chemie International Edition<br>10.1002/anie.201511999 (2016)                                                                                          |
| G4L9371 | 5HIX | X-RAY DIFFRACTION | Mandal, P.K., Baptiste, B., Langlois d'Estaintot, B., Kauffmann, B., Huc, I.<br>Multivalent Interactions between an Aromatic Helical Foldamer and a DNA G-Quadruplex in the Solid State.<br>ChemBiochem<br>10.1002/cbic.201600281 (2016)                                                                                          |
| G4L7634 | 5LIG | SOLUTION NMR      | Kotar, A., Wang, B., Shivalingam, A., Gonzalez-Garcia, J., Vilar, R., Plavec, J.<br>NMR Structure of a Triangulenium-Based Long-Lived Fluorescence Probe Bound to a G-Quadruplex.<br>Angewandte Chemie International Edition<br>10.1002/anie.201606877 (2016)                                                                     |
| G4L7775 | 4P1D | X-RAY DIFFRACTION | Ferraroni, M., Bazzicalupi, C., Gratteri, P., Bilia, A.R., Sissi, C.<br>Crystal Structure of the complex of a bimolecular human telomeric DNA with Coptisine<br><br>To be published ()                                                                                                                                            |
| G4L8206 | 5LS8 | X-RAY DIFFRACTION | McQuaid, K., Abell, H., Gurung, S.P., Allan, D.R., Winter, G., Sorensen, T., Cardin, D.J., Brazier, J.A., Cardin, C.J., Hall, J.P.<br>Structural Studies Reveal Enantiospecific Recognition of a DNA G-Quadruplex by a Ruthenium Polypyridyl Complex.<br>Angewandte Chemie International Edition<br>10.1002/anie.201814502 (2019) |

## SUPPORTING DATA

|         |      |                   |                                                                                                                                                                                                                                                                                                                                                                                                                                       |
|---------|------|-------------------|---------------------------------------------------------------------------------------------------------------------------------------------------------------------------------------------------------------------------------------------------------------------------------------------------------------------------------------------------------------------------------------------------------------------------------------|
| G4L9052 | 5W77 | SOLUTION NMR      | <p>Calabrese, D.R., Chen, X., Leon, E.C., Gaikwad, S.M., Phyto, Z., Hewitt, W.M., Alden, S., Hilimire, T.A., He, F., Michalowski, A.M., Simmons, J.K., Saunders, L.B., Zhang, S., Connors, D., Walters, K.J., Mock, B.A., Schneekloth Jr., J.S.</p> <p>Chemical and structural studies provide a mechanistic basis for recognition of the MYC G-quadruplex.</p> <p>Nature Communications</p> <p>10.1038/s41467-018-06315-w (2018)</p> |
| G4L9206 | 5Z8F | SOLUTION NMR      | <p>Liu, W., Zhong, Y.F., Liu, L.Y., Shen, C.T., Zeng, W., Wang, F., Yang, D., Mao, Z.W.</p> <p>Solution structures of multiple G-quadruplex complexes induced by a platinum(II)-based tripod reveal dynamic binding</p> <p>Nature Communications</p> <p>10.1038/s41467-018-05810-4 (2018)</p>                                                                                                                                         |
| G4L7774 | 6CCW | SOLUTION NMR      | <p>Lin, C., Wu, G., Wang, K., Onel, B., Sakai, S., Shao, Y., Yang, D.</p> <p>Molecular Recognition of the Hybrid-2 Human Telomeric G-Quadruplex by Epiberberine: Insights into Conversion of Telomeric G-Quadruplex Structures.</p> <p>Angewandte Chemie International Edition</p> <p>10.1002/anie.201804667 (2018)</p>                                                                                                               |
| G4L7369 | 6E81 | X-RAY DIFFRACTION | <p>Sjekloca, L., Ferre-D'Amare, A.R.</p> <p>Binding between G Quadruplexes at the Homodimer Interface of the Corn RNA Aptamer Strongly Activates Thioflavin T Fluorescence.</p> <p>Cell Chemical Biology</p> <p>10.1016/j.chembiol.2019.04.012 (2019)</p>                                                                                                                                                                             |
| G4L7369 | 6E82 | X-RAY DIFFRACTION | <p>Sjekloca, L., Ferre-D'Amare, A.R.</p> <p>Binding between G Quadruplexes at the Homodimer Interface of the Corn RNA</p>                                                                                                                                                                                                                                                                                                             |

## SUPPORTING DATA

|         |      |                   |                                                                                                                                                                                                                                                                                                                                                     |
|---------|------|-------------------|-----------------------------------------------------------------------------------------------------------------------------------------------------------------------------------------------------------------------------------------------------------------------------------------------------------------------------------------------------|
|         |      |                   | Aptamer Strongly Activates Thioflavin T Fluorescence.<br>Cell Chemical Biology<br>10.1016/j.chembiol.2019.04.012 (2019)                                                                                                                                                                                                                             |
| G4L8065 | 6E84 | X-RAY DIFFRACTION | Sjekloca, L., Ferre-D'Amare, A.R.<br>Binding between G Quadruplexes at the Homodimer Interface of the Corn RNA Aptamer Strongly Activates Thioflavin T Fluorescence.<br>Cell Chemical Biology<br>10.1016/j.chembiol.2019.04.012 (2019)                                                                                                              |
| G4L9017 | 6H5R | X-RAY DIFFRACTION | Guarra, F., Marzo, T., Ferraroni, M., Papi, F., Bazzicalupi, C., Gratteri, P., Pescitelli, G., Messori, L., Biver, T., Gabbiani, C.<br>Interaction of a gold(i) dicarbene anticancer drug with human telomeric DNA G-quadruplex: solution and computationally aided X-ray diffraction analysis.<br>Dalton Transactions<br>10.1039/c8dt03607a (2018) |
| G4L7307 | 6JJ0 | SOLUTION NMR      | Liu, W., Lin, C., Wu, G., Dai, J., Chang, T.C., Yang, D.<br>Structures of 1:1 and 2:1 complexes of BMVC and MYC promoter G-quadruplex reveal a mechanism of ligand conformation adjustment for G4-recognition.<br>Nucleic Acids Research<br>10.1093/nar/gkz1015 (2019)                                                                              |
| G4L0073 | 6JJI | X-RAY DIFFRACTION | Zhang, Y., El Omari, K., Duman, R., Liu, S., Haider, S., Wagner, A., Parkinson, G.N., Wei, D.<br>Native de novo structural determinations of non-canonical nucleic acid motifs by X-ray crystallography at long wavelengths.<br>Nucleic Acids Research<br>10.1093/nar/gkaa439 (2020)                                                                |

## SUPPORTING DATA

---

|         |      |                   |                                                                                                                                                                                                                                                                           |
|---------|------|-------------------|---------------------------------------------------------------------------------------------------------------------------------------------------------------------------------------------------------------------------------------------------------------------------|
| G4L1041 | 6JWD | SOLUTION NMR      | Wang, F., Wang, C., Liu, Y., Lan, W., Han, H., Wang, R., Huang, S., Cao, C.<br>Colchicine selective interaction with oncogene RET G-quadruplex revealed by NMR.<br>Chemical Communications<br>10.1039/d0cc00221f (2020)                                                   |
| G4L1336 | 6JWE | SOLUTION NMR      | Wang, F., Wang, C., Liu, Y., Lan, W., Han, H., Wang, R., Huang, S., Cao, C.<br>Colchicine selective interaction with oncogene RET G-quadruplex revealed by NMR.<br>Chemical Communications<br>10.1039/d0cc00221f (2020)                                                   |
| G4L0073 | 6KFL | X-RAY DIFFRACTION | Zhang, Y.S., Parkinson, G.N., Wei, D.G.<br>Crystal structure of a two-quartet DNA G-quadruplex complexed with the porphyrin<br>TMPyP4<br><br>To be published ()                                                                                                           |
| G4L7500 | 6KN4 | SOLUTION NMR      | Barthwal, R., Raje, S., Pandav, K.<br>Structural basis for stabilization of human telomeric G-quadruplex [d-(TTAGGGT)] <sub>4</sub><br>by anticancer drug adriamycin.<br>Journal of Biomolecular Structure & Dynamics<br>10.1080/07391102.2020.1730969 (2021)             |
| G4L7307 | 6O2L | SOLUTION NMR      | Liu, W., Lin, C., Wu, G., Dai, J., Chang, T.C., Yang, D.<br>Structures of 1:1 and 2:1 complexes of BMVC and MYC promoter G-quadruplex<br>reveal a mechanism of ligand conformation adjustment for G4-recognition.<br>Nucleic Acids Research<br>10.1093/nar/gkz1015 (2019) |
| G4L8206 | 6RNL | X-RAY DIFFRACTION | McQuaid, K., Hall, J.P., Baumgaertner, L., Cardin, D.J., Cardin, C.J.<br>Three thymine/adenine binding modes of the ruthenium complex                                                                                                                                     |

## SUPPORTING DATA

|         |      |                   |                                                                                                                                                                                                                                                                                                                                                             |
|---------|------|-------------------|-------------------------------------------------------------------------------------------------------------------------------------------------------------------------------------------------------------------------------------------------------------------------------------------------------------------------------------------------------------|
|         |      |                   | <p>Lambda-[Ru(TAP)<sub>2</sub>(dppz)]<sub>2</sub>+to the G-quadruplex forming sequence d(TAGGGTT) shown by X-ray crystallography.<br/>           Chemical Communications<br/>           10.1039/c9cc04316k (2019)</p>                                                                                                                                       |
| G4L1041 | 6S15 | X-RAY DIFFRACTION | <p>Papi, F., Bazzicalupi, C., Ferraroni, M., Ciolli, G., Lombardi, P., Khan, A.Y., Kumar, G.S., Gratteri, P.<br/>           Pyridine Derivative of the Natural Alkaloid Berberine as Human Telomeric G4-DNA Binder: A Solution and Solid-State Study.<br/>           ACS Medicinal Chemistry Letters<br/>           10.1021/acsmchemlett.9b00516 (2020)</p> |
| G4L7402 | 6SX3 | SOLUTION NMR      | <p>Kotar, A., Kocman, V., Plavec, J.<br/>           Intercalation of a Heterocyclic Ligand between Quartets in a G-Rich Tetrahelical Structure.<br/>           Chemistry<br/>           10.1002/chem.201904923 (2020)</p>                                                                                                                                   |
| G4L9651 | 7KLP | X-RAY DIFFRACTION | <p>Li, K., Yatsunyk, L., Neidle, S.<br/>           Water spines and networks in G-quadruplex structures.<br/>           Nucleic Acids Research<br/>           10.1093/nar/gkaa1177 (2021)</p>                                                                                                                                                               |
| G4L0174 | 3CE5 | X-RAY DIFFRACTION | <p>Campbell, N.H., Parkinson, G.N., Reszka, A.P., Neidle, S.<br/>           Structural basis of DNA quadruplex recognition by an acridine drug.<br/>           J Am Chem Soc<br/>           10.1021/ja8016973 (2008)</p>                                                                                                                                    |
| G4L1584 | 3MIJ | X-RAY DIFFRACTION | <p>Collie, G.W., Sparapani, S., Parkinson, G.N., Neidle, S.<br/>           Structural basis of telomeric RNA quadruplex-acridine ligand recognition.</p>                                                                                                                                                                                                    |

## SUPPORTING DATA

---

|  |  |  |                                    |
|--|--|--|------------------------------------|
|  |  |  | J Am Chem Soc<br>10.1021/ja109767y |
|--|--|--|------------------------------------|
